# Supplementary material for: Molecular basis of cerium oxide nanoparticle enhancement of rice salt tolerance and yield
Source: Royal Society of Chemistry journal article supplement (doi:10.1039/d1en00390a), 2021-01-01
Supplement: d1en00390a2.xlsx [file d1en00390a2.xlsx]

## Sheet: Table S1
Supplementary Table 1. Elemental nutrient content in rice plants and grain under normal and salinity stress condition
	Flag leaves					Straw					Rice grain					Linearity	Standard curve				R2
	Con	PNC	NaCl	NaCl+PNC		Con	PNC	NaCl	NaCl+PNC		Con	PNC	NaCl	NaCl+PNC
P	0.274±0.068	0.388±0.051	0.163±0.028	0.21±0.035		2.11±0.22	2.25±0.31	0.861±0.052	0.892±0.037		2.22±0.31	1.71±0.29	2.28±0.26	1.84±0.33		0.5-50 mg/L		Y=442.6X+109.56			0.99899
	b	a	c	bc		a	a	b	b		ab	b	a	ab
Ca	0.245±0.028	0.344±0.052	0.643±0.057	0.689±0.039		0.091±0.008	0.081±0.007	0.101±0.008	0.102±0.007		0.062±0.007	0.063±0.006	0.047±0.005	0.056±0.007		0.5-50 mg/L		Y=29374.56X-35239.26			0.99928
	c	b	a	a		ab	b	a	a		a	a	b	ab
Mg	0.142±0.008	0.179±0.009	0.211±0.021	0.228±0.013		0.075±0.006	0.057±0.006	0.233±0.018	0.175±0.023		0.191±0.012	0.151±0.011	0.139±0.012	0.167±0.009		0.5-50 mg/L		Y=84977.17-29480.72			0.99932
	c	b	a	a		c	d	a	b		a	c	c	b
Fe	0.007±0.001	0.008±0.001	0.006±0.001	0.006±0.001		0.006±0.001	0.007±0.001	0.007±0.001	0.009±0.001		0.005±0.001	0.004±0.001	0.005±0.001	0.005±0.001		0.05-5 mg/L		Y=25849.85X-27647.03			0.99879
						b	ab	ab	a
Mn	0.021±0.005	0.011±0.003	0.011±0.002	0.009±0.002		0.018±0.003	0.018±0.005	0.016±0.004	0.019±0.004		0.006±0.001	0.004±0.001	0.006±0.001	0.005±0.001		0.05-5 mg/L		Y=241956.92X-293635.89			0.99929
	a	b	b	b
Cu	0.054±0.005	0.046±0.006	0.012±0.002	0.016±0.002		0.018±0.001	0.018±0.002	0.007±0.001	0.009±0.001		0.007±0.001	0.008±0.001	0.01±0.001	0.009±0.001		0.05-5 mg/L		Y=5626.7X-92.051			0.99983
	a	a	c	b		a	a	c	b		b	b	a	a
B	0.054±0.004	0.058±0.006	0.028±0.003	0.025±0.004		0.018±0.005	0.021±0.004	0.018±0.003	0.021±0.003		0.011±0.003	0.007±0.001	0.010±0.003	0.008±0.002		0.05-5 mg/L		Y=842.65X+1676.29			0.99925
	a	a	b	b							a	b	a	ab
Ni	0.037±0.005	0.018±0.003	0.013±0.003	0.011±0.002		0.009±0.002	0.007±0.003	0.013±0.002	0.016±0.004		0.008±0.002	0.011±0.002	0.013±0.002	0.007±0.002		0.05-5 mg/L		Y=54.78X-124.12			0.99996
	a	b	c	c		b	c	ab	a		b	ab	a	b
K	0.161±0.013	0.159±0.016	0.074±0.009	0.097±0.007		0.389±0.041	0.396±0.0223	0.251±0.018	0.242±0.019		2.12±0.14	1.76±0.22	1.49±0.25	1.27±0.18		0.5-50 mg/L		Y=73460.96X-96050.26			0.99901
	a	a	c	b		a	a	b	b		a	b	c	c

## Sheet: Table S2
Supplementary Table S2. Internal standards and standard curve in determination of Ce content by ICP/MS
Row Index Number	In 115
1
2
3	1
4	0.994979
5	0.991655
6	0.987614
7	0.993047
8	0.995878
10	0.95322
11	0.911925
12	1.06634
13	1.07884
14	1.08116
15	1.06748
16	1.05095
17	1.02724
18	1.06204
19	1.04118
20	1.08129
21	1.10886
22	1.10377
23	1.11575
24	1.07332
25	1.04638
26	1.03784
27	1.03019
28	1.03252
29	1.05819
30	1.051
31	1
32	0.982348
33	1.03042
34	1.02901
35	1.0296
36	1.03003
37	1
38	0.982348
39	1.03042
40	1.02901
41	1.0296
42	1.03003
43	1.01402
44	1.00419
45	0.931555
46	0.891054
47	0.876187
48	0.944149
49	0.983133
50	0.980941
51	0.999686
52	0.962001
53	0.944733
54	0.92883
55	0.891537
56	0.837507
57	0.803281
58	0.900981
59	0.901913
60	0.92497
61	0.907531
62	0.928515
63	0.929401
64	0.94076
65	0.821335
66	0.82455
67	0.830008

## Sheet: Table S3
Supplementary Table S3. Standard curve in determination of starch content in rice grain and Na/K in rice seedlings
		Standard curve	R2	Linearity
	Starch	Y=0.542X+0.0007	0.9977	0-150 mg/L
	Na	Y=34878.81X+16468.24	0.999571	0.5-50 mg/L
	K	Y=32829X-54032.84	0.999545	0.5-50 mg/L

## Sheet: Table S4
Supplementary Table S4. Confocal imaging of rice seedling leaves without DAF-FM DA staining
